# Supplementary material for: Structural, magnetic, redox and theoretical characterization of seven-coordinate first-row transition metal complexes with a macrocyclic ligand containing two benzimidazolyl N-pendant arms
Source: Royal Society of Chemistry journal article supplement (doi:10.1039/d0dt00166j), 2020-01-01
Supplement: d0dt00166j1.pdf [file d0dt00166j1.pdf]

**Electronic Supplementary Information**  
**for**  
**Structural, magnetic, redox and theoretical**  
**characterization of seven-coordinate first-row**  
**transition metal complexes with macrocyclic ligand**  
**containing two benzimidazolyl *N*-pendant arms**

*Bohuslav Drahoš,<sup>a\*</sup> Ivana Císařová,<sup>b</sup> Oleksii Laguta,<sup>c</sup> Vinicius T. Santana,<sup>c</sup> Petr Neugebauer<sup>c</sup> and  
Radovan Herchel<sup>a</sup>*

<sup>a</sup> *Department of Inorganic Chemistry, Faculty of Science, Palacký University, 17. listopadu 12, 771 46 Olomouc, Czech Republic, Fax: +420 585 634 954. Tel: +420 585 634 429. E-mail: bohuslav.drahos@upol.cz*

<sup>b</sup> *Department of Inorganic Chemistry, Faculty of Science, Charles University, Hlavova 2030, 128 00 Prague, Czech Republic*

<sup>c</sup> *Central European Institute of Technology, CEITEC BUT, Purkyňova 656/123, 61200 Brno, Czech Republic.*

**Table of contents:**

**Figure S1.** ESI mass spectra of **L** and studied complexes **1–4**.

**Figure S2.** IR spectra of studied complexes **1–4**.

**Figure S3.** <sup>1</sup>H–<sup>13</sup>C *gs*-HMQC NMR spectrum of **L**.

**Figure S4.** <sup>1</sup>H–<sup>13</sup>C *gs*-HMBC NMR spectrum of **L**.

**Figure S5.** HFEPFR measurements of a powder sample of compound **2** at 4 K and 180 GHz, 321 GHz and 415 GHz.

**Figure S6.** In-phase  $\chi_{\text{real}}$  and out-of-phase  $\chi_{\text{imag}}$  molar susceptibilities for **3** at zero and non-zero static magnetic field.

**Figure S7.** Cyclic voltammogram of **CH<sub>3</sub>NO<sub>2</sub>** in **CH<sub>3</sub>CN**.

**Figure S8.** Cyclic voltammogram of **L**.

**Figure S9.** Comparison of cyclic voltammograms of **1** and  $[\text{Mn}(\text{L2})](\text{ClO}_4)_2$ .

**Figure S10.** Comparison of cyclic voltammograms of **2** and  $[\text{Fe}(\text{L2})](\text{ClO}_4)_2$ .

**Figure S11.** Comparison of cyclic voltammograms of **3** and  $[\text{Co}(\text{L2})](\text{ClO}_4)_2$ .

**Table S1.** Crystal data and structure refinements for studied complexes **1–4**.

**Table S2.** Results of continuous shape measures calculations using program Shape 2.1 for compounds **1–4**.

**Table S3.** Parameters of one-component Debye model for **3**.

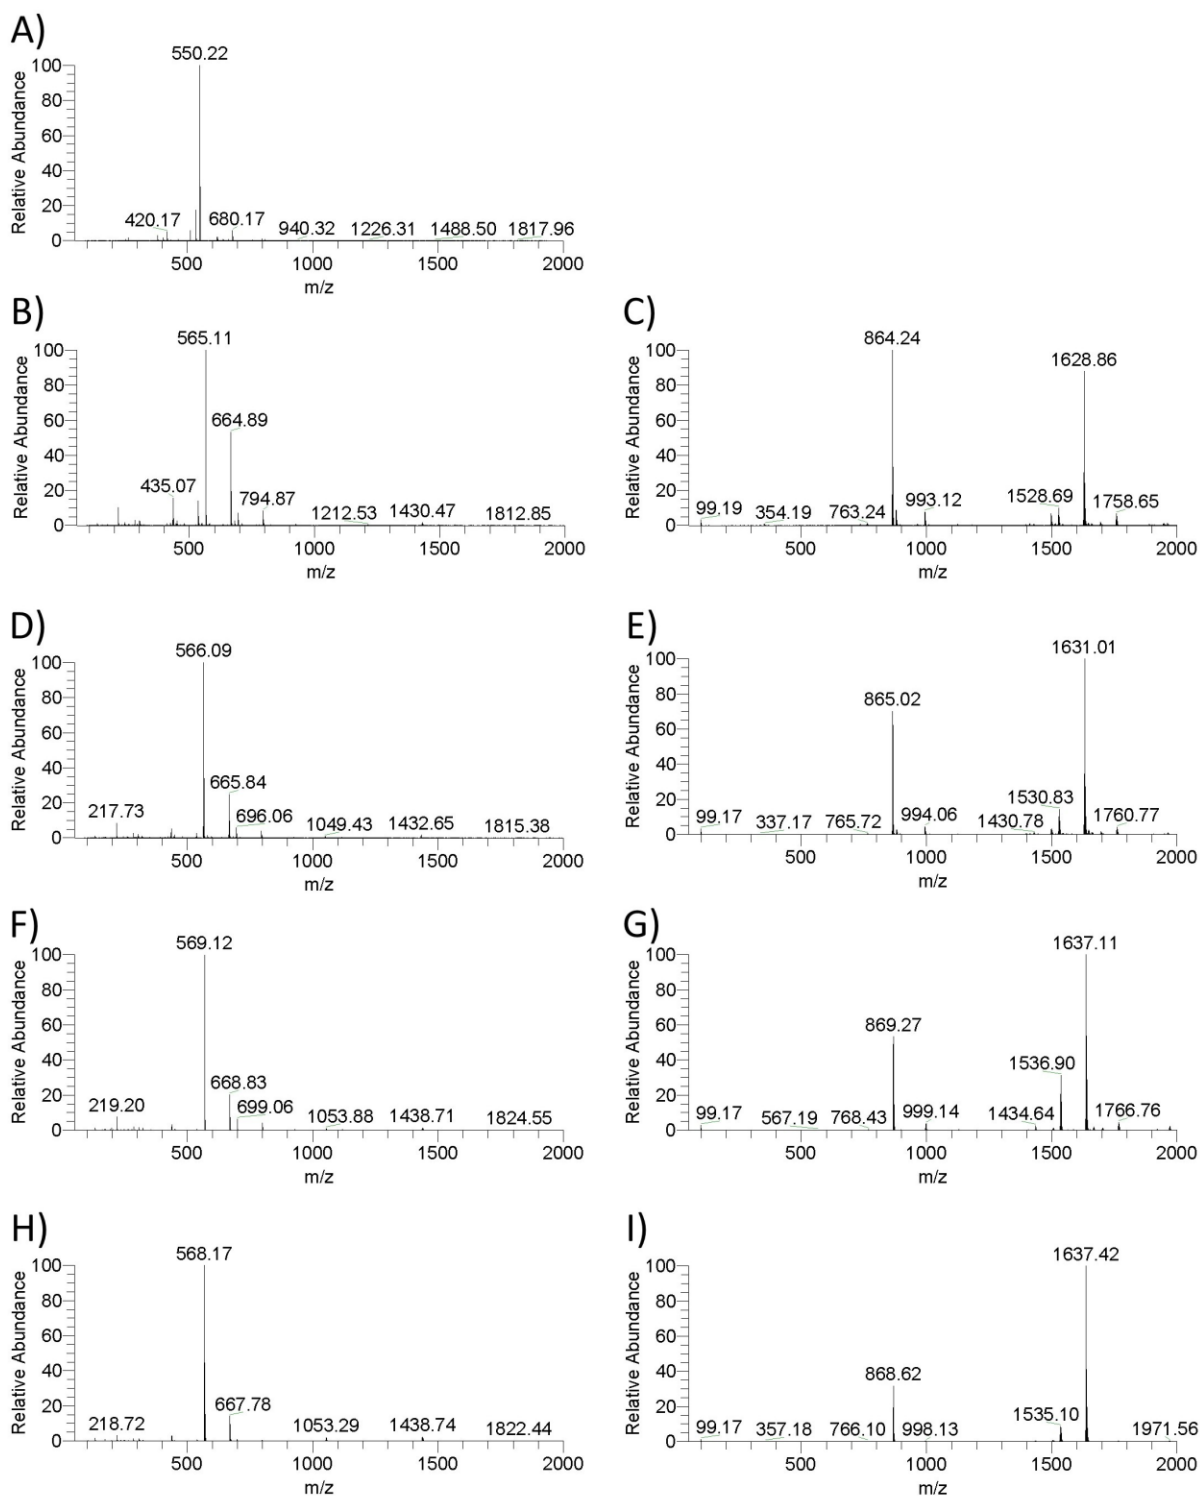

**Figure S1** ESI mass spectra of the ligand **L** (A) and studied complexes **1** (B,C), **2** (D,E), **3** (F,G), **4** (H,I) (positive mode: A,B,D,F,H; negative mode: C,E,G,I).

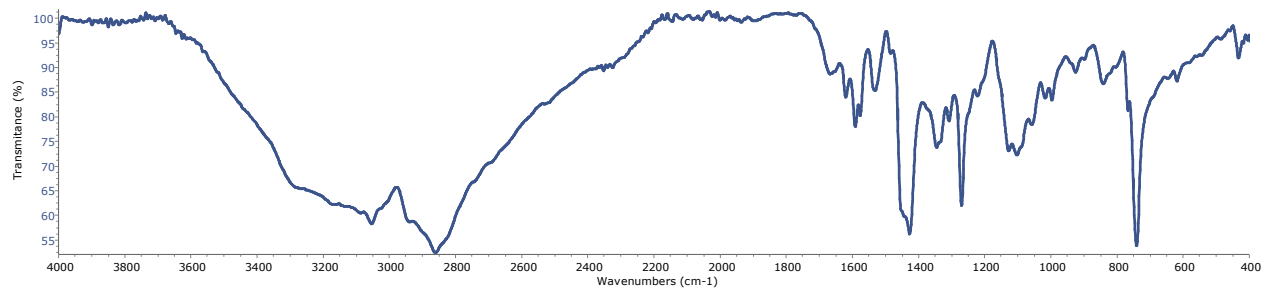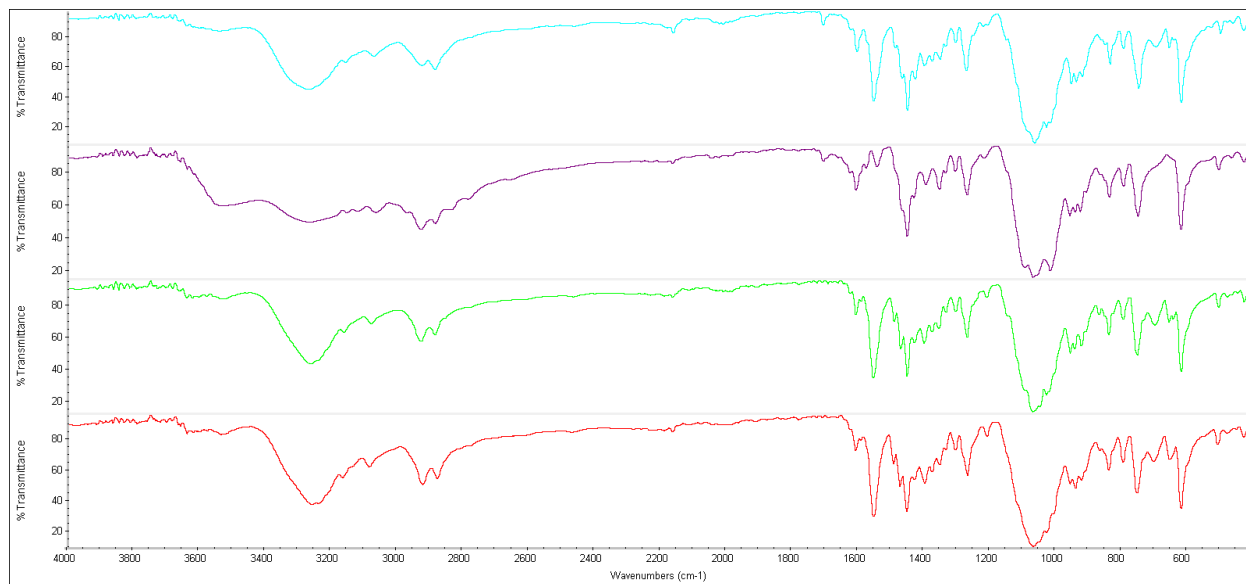

**Figure S2** IR spectra of the studied ligand **L** (*dark blue*) and complexes **1** (*light blue*), **2** (*purple*), **3** (*green*) and **4** (*red*).

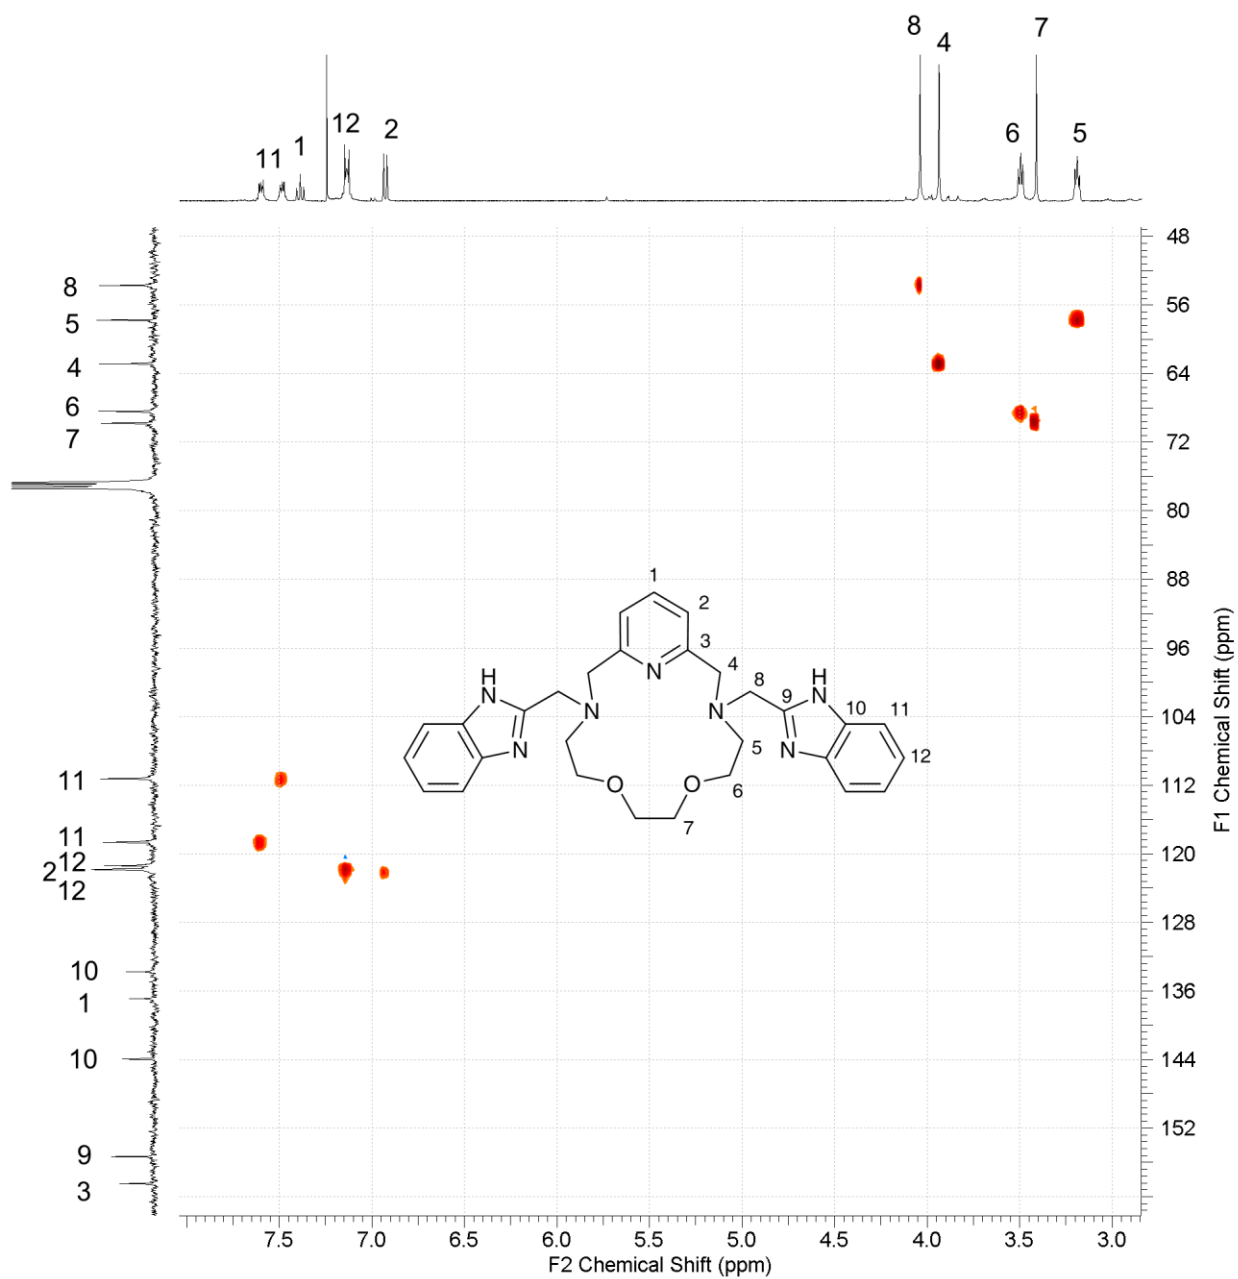

**Figure S3**  $^1\text{H}$ - $^{13}\text{C}$  *gs*-HMQC NMR spectrum (400 MHz,  $\text{CDCl}_3$ ) of **L** (3,12-bis((1*H*-benzimidazol-2-yl)methyl)-6,9-dioxa-3,12,18-triazabicyclo[12.3.1]octadeca-1(18),14,16-triene) with the residual peak of  $\text{CHCl}_3$  at 7.27 ppm ( $^1\text{H}$ ) and  $\text{CDCl}_3$  at 77.0 ppm ( $^{13}\text{C}$ ).

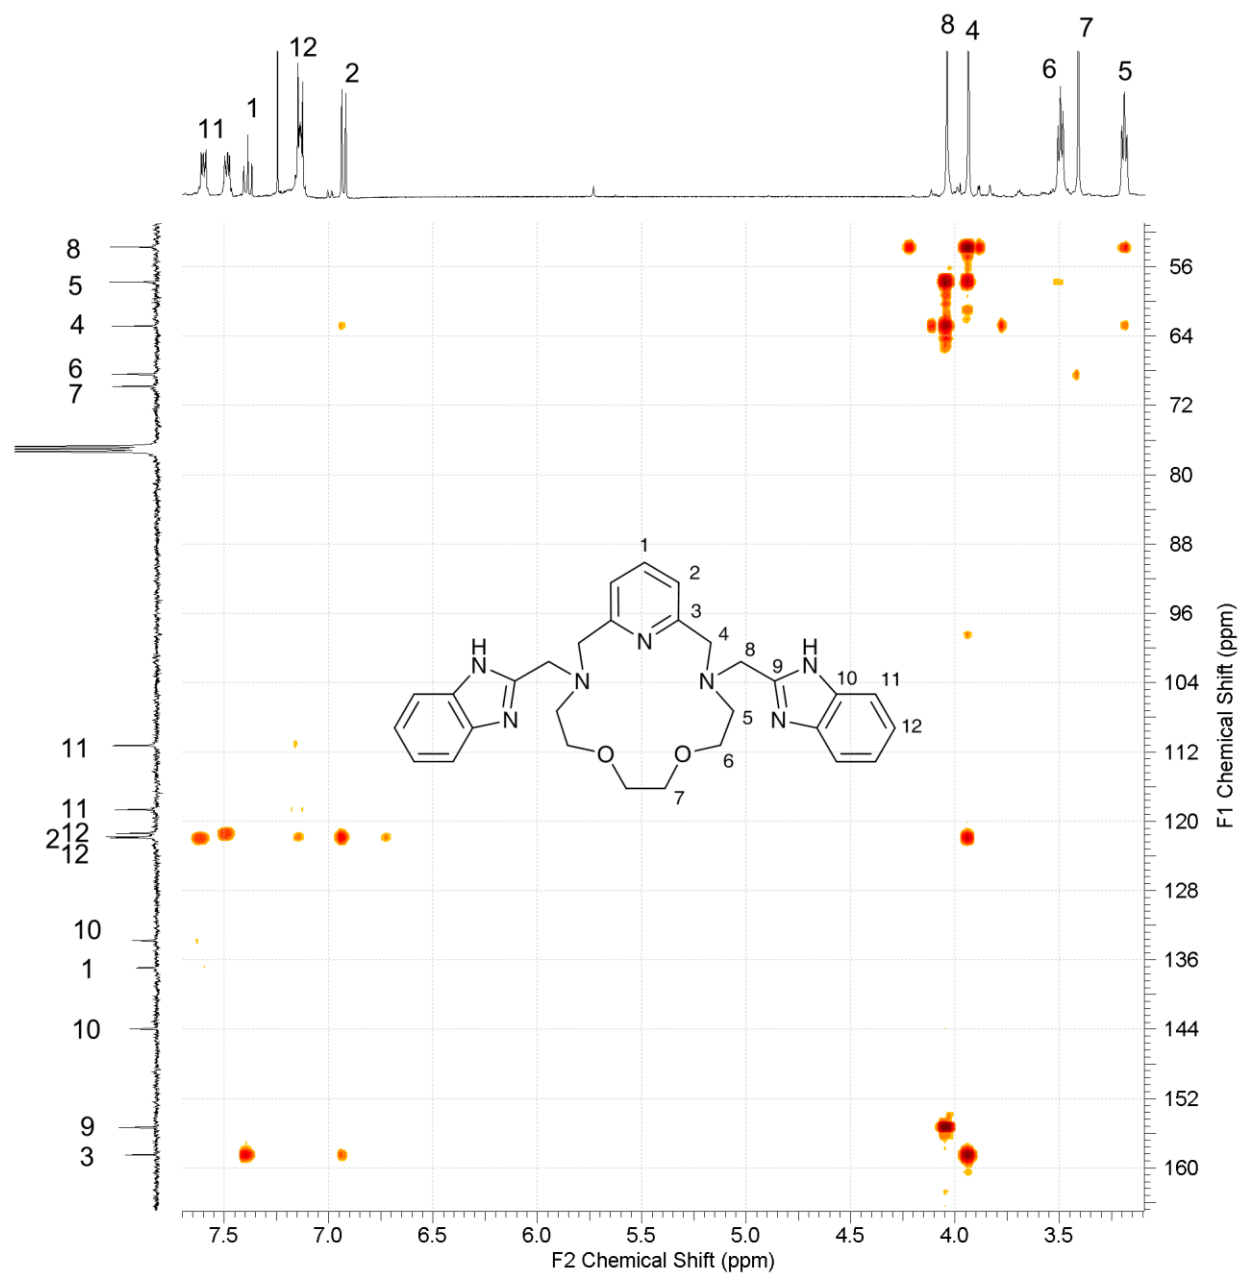

**Figure S4**  $^1\text{H}$ - $^{13}\text{C}$   $g_S$ -HMBC NMR spectrum (400 MHz,  $\text{CDCl}_3$ ) of **L** (3,12-bis((1*H*-benzimidazol-2-yl)methyl)-6,9-dioxo-3,12,18-triazabicyclo[12.3.1]octadeca-1(18),14,16-triene) with the residual peak of  $\text{CHCl}_3$  at 7.27 ppm ( $^1\text{H}$ ) and  $\text{CDCl}_3$  at 77.0 ppm ( $^{13}\text{C}$ ).

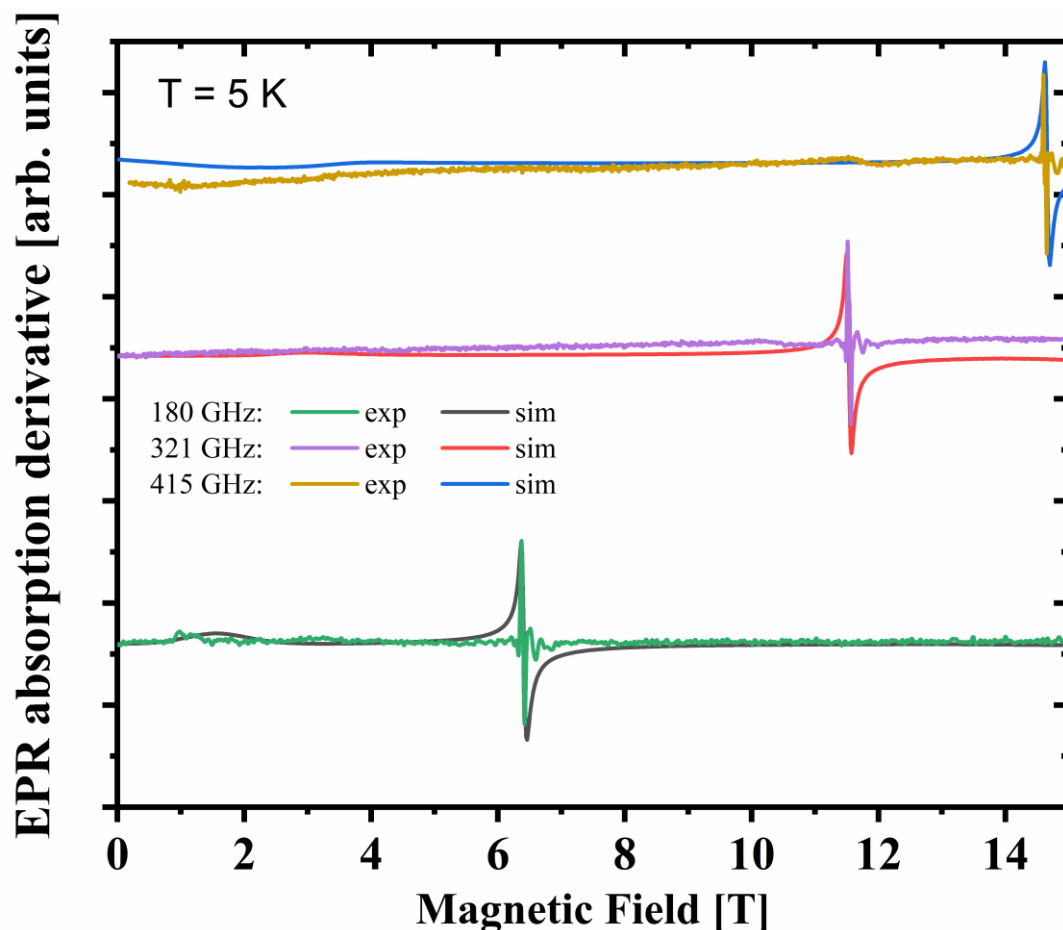

**Figure S5** HFEPR measurements of a powder sample of compound **2** at 4 K and 180 GHz, 321 GHz and 415 GHz. At  $T > 10$  K, there was no absorption in any of the tested frequencies (not shown), in agreement with simulated results, which present a significant decrease of the absorption intensity for a small increase in temperature. Relaxation and population of excited states determines the spectra properties at different temperatures. The simulation was performed for a spin  $S = 2$  system using the CASSCF/NEVTP2 calculated  $g$  values from Table 3, but with  $D = + 8.2 \text{ cm}^{-1}$  and  $E/D = 0.29$ . Anisotropic broadening of 50 GHz was included in the simulation in order to fit the experimental data (HStrain in the  $y$  direction coincident with the higher  $g$  value.)

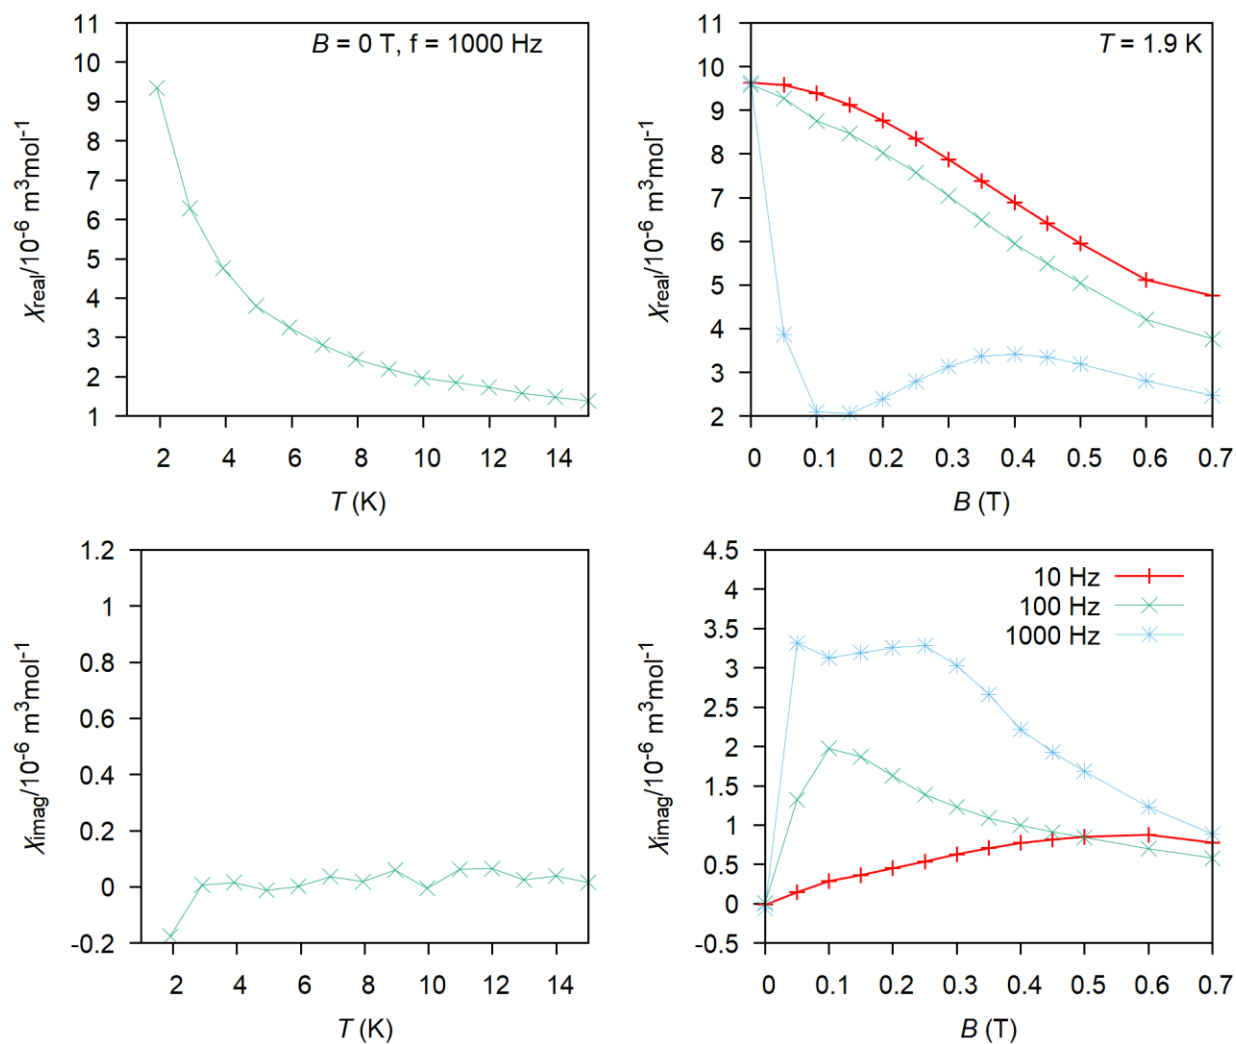

**Figure S6** In-phase  $\chi_{\text{real}}$  and out-of-phase  $\chi_{\text{imag}}$  molar susceptibilities for **3** at zero static magnetic field (*left*) and in non-zero static field (*right*). Lines serve as guides for the eyes.



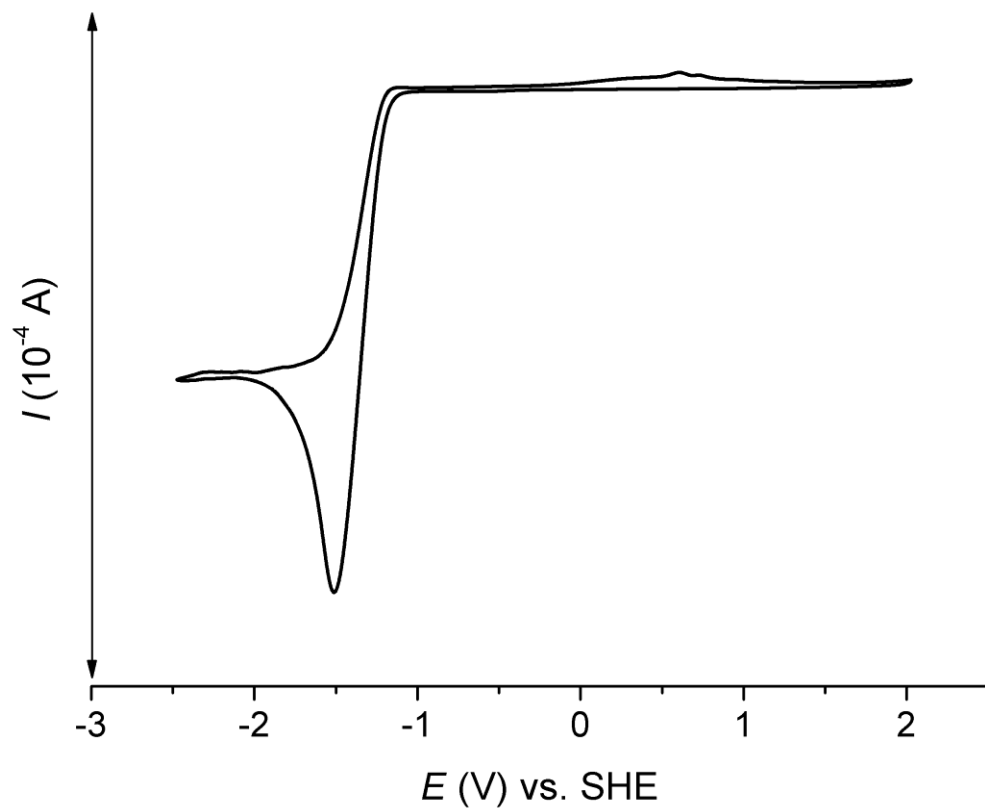

**Figure S7** Cyclic voltammogram of  $\text{CH}_3\text{NO}_2$  recorded with a glassy carbon electrode at the rate 100 mV/s using 0.1M tetrabutylammonium perchlorate as supporting electrolyte in  $\text{CH}_3\text{CN}$  under argon atmosphere.

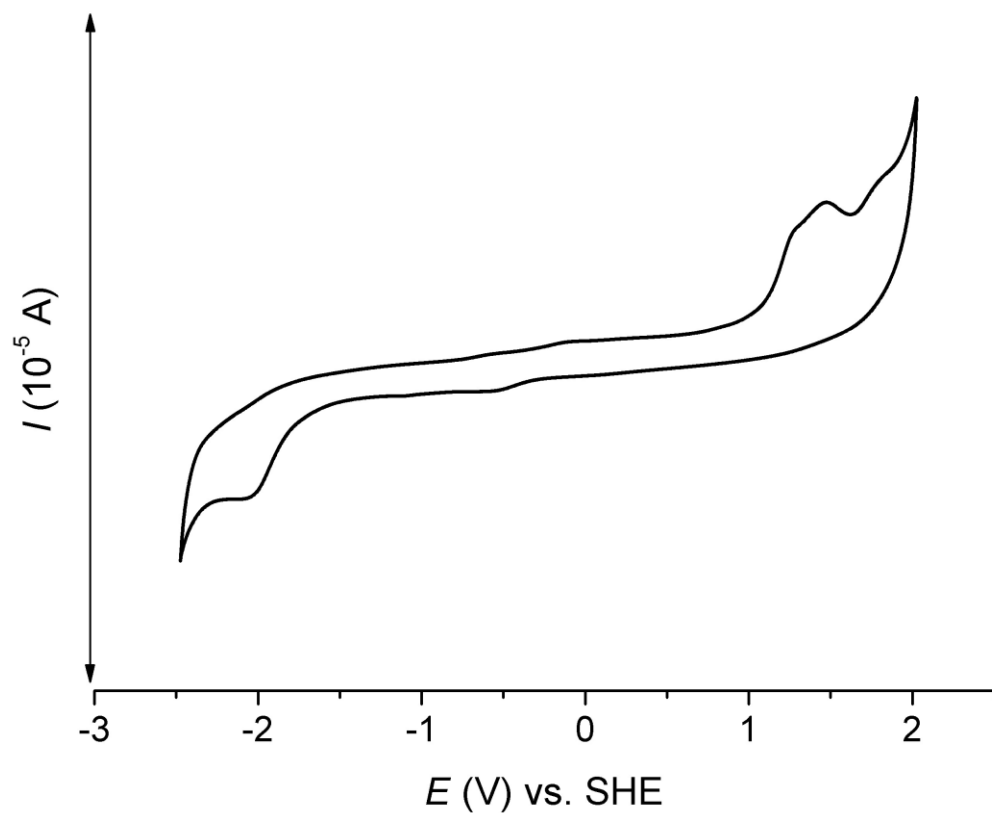

**Figure S8** Cyclic voltammogram of **L** recorded with a glassy carbon electrode at the rate 100 mV/s using 0.1M tetrabutylammonium perchlorate as supporting electrolyte in  $\text{CH}_3\text{CN}$  under argon atmosphere.

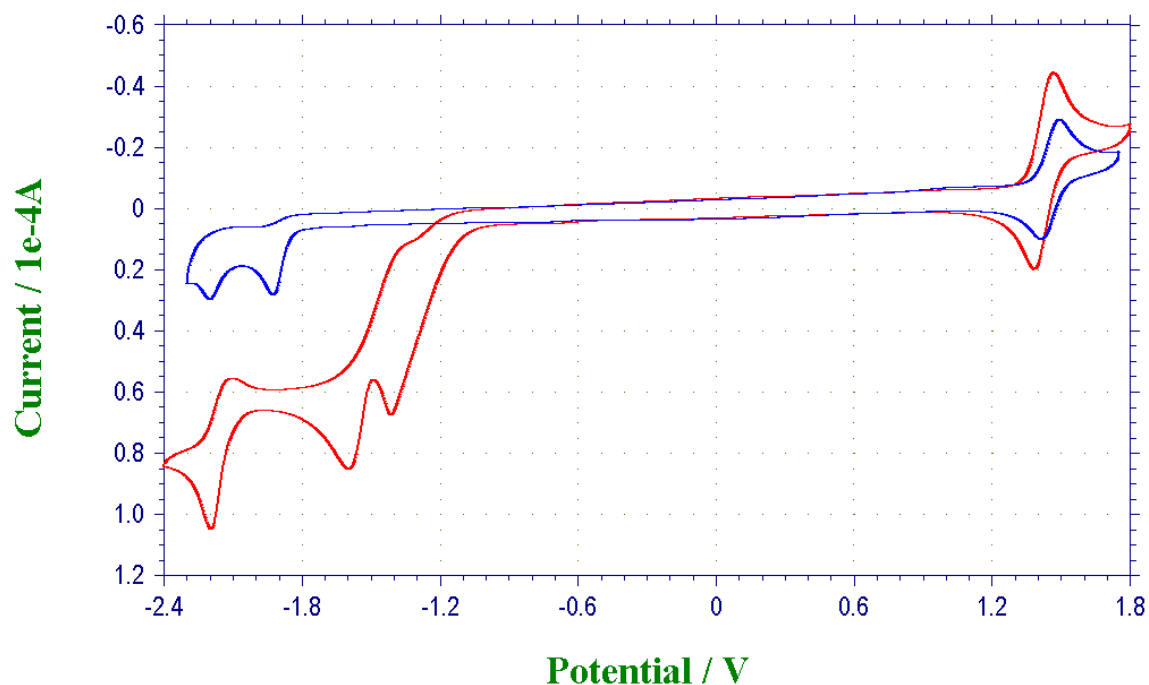

**Figure S9** Comparison of cyclic voltammograms of **1** (*red*) and  $[\text{Mn}(\text{L}2)](\text{ClO}_4)_2$  (*blue*) recorded with a glassy carbon electrode at the rate 100 mV/s using 0.1M tetrabutylammonium perchlorate as supporting electrolyte in  $\text{CH}_3\text{CN}$  under argon atmosphere.

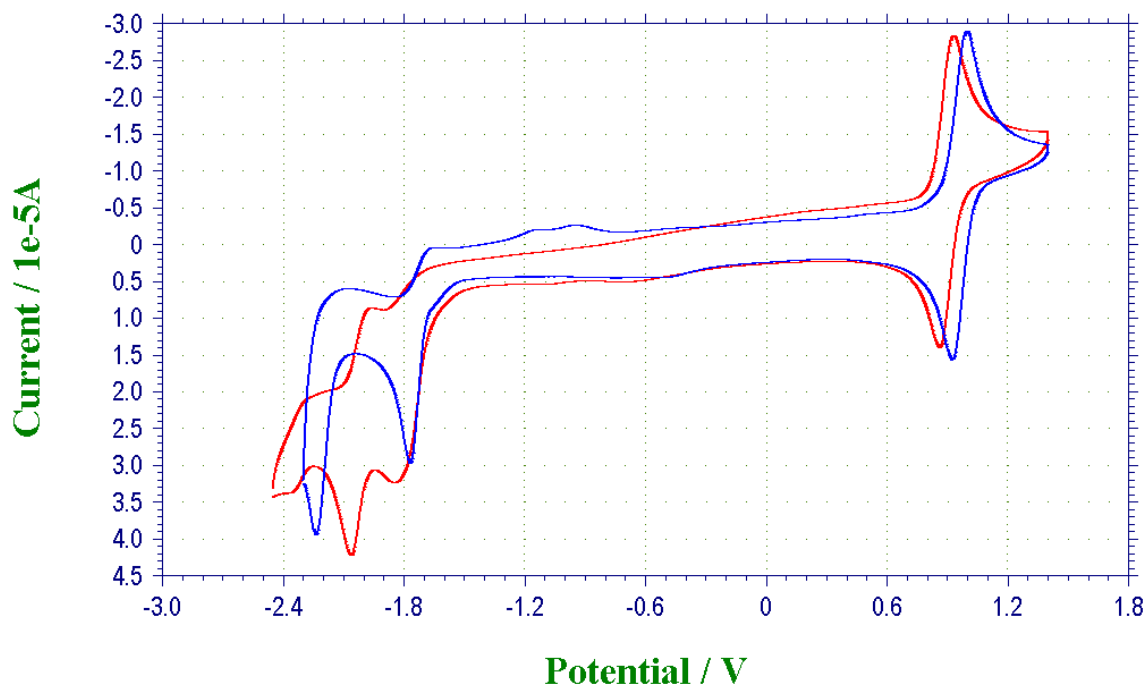

**Figure S10** Comparison of cyclic voltammograms of **2** (*red*) and  $[\text{Fe}(\text{L}2)](\text{ClO}_4)_2$  (*blue*) recorded with a glassy carbon electrode at the rate 100 mV/s using 0.1M tetrabutylammonium perchlorate as supporting electrolyte in  $\text{CH}_3\text{CN}$  under argon atmosphere.

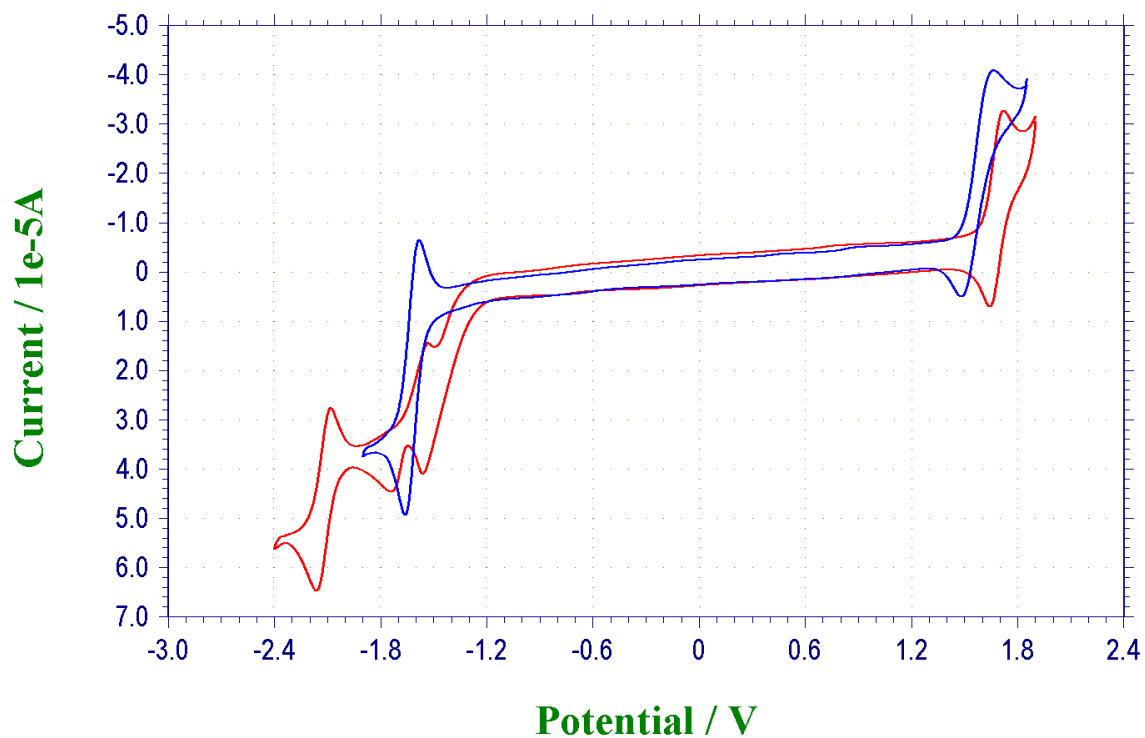

**Figure S11** Comparison of cyclic voltammograms of **3** (*red*) and  $[\text{Co}(\mathbf{L2})](\text{ClO}_4)_2$  (*blue*) recorded with a glassy carbon electrode at the rate 100 mV/s using 0.1M tetrabutylammonium perchlorate as supporting electrolyte in  $\text{CH}_3\text{CN}$  under argon atmosphere.

**Table S1** Crystal data and structure refinements for studied complexes **1–4**.

| Compound                                                                                 | <b>1</b>                                                                                        | <b>2</b>                                                                                        | <b>3</b>                                                                                        | <b>4</b>                                                                                        |
|------------------------------------------------------------------------------------------|-------------------------------------------------------------------------------------------------|-------------------------------------------------------------------------------------------------|-------------------------------------------------------------------------------------------------|-------------------------------------------------------------------------------------------------|
| Formula                                                                                  | C <sub>61</sub> H <sub>75</sub> Cl <sub>4</sub> Mn <sub>2</sub> N <sub>17</sub> O <sub>26</sub> | C <sub>61</sub> H <sub>75</sub> Cl <sub>4</sub> Fe <sub>2</sub> N <sub>17</sub> O <sub>26</sub> | C <sub>61</sub> H <sub>75</sub> Cl <sub>4</sub> Co <sub>2</sub> N <sub>17</sub> O <sub>26</sub> | C <sub>61</sub> H <sub>75</sub> Cl <sub>4</sub> Ni <sub>2</sub> N <sub>17</sub> O <sub>26</sub> |
| <i>M</i> <sub>r</sub>                                                                    | 1714.06                                                                                         | 1715.88                                                                                         | 1722.04                                                                                         | 1721.60                                                                                         |
| Temperature (K)                                                                          | 150(2)                                                                                          | 150(2)                                                                                          | 150(2)                                                                                          | 150(2)                                                                                          |
| Wavelength (Å)                                                                           | 0.71073                                                                                         | 0.71073                                                                                         | 0.71073                                                                                         | 0.71073                                                                                         |
| Crystal system                                                                           | triclinic                                                                                       | triclinic                                                                                       | triclinic                                                                                       | triclinic                                                                                       |
| Space group                                                                              | P-1                                                                                             | P-1                                                                                             | P-1                                                                                             | P-1                                                                                             |
| <i>a</i> (Å)                                                                             | 13.8753(4)                                                                                      | 13.8335(4)                                                                                      | 13.8322(4)                                                                                      | 13.8336(4)                                                                                      |
| <i>b</i> (Å)                                                                             | 14.9584(4)                                                                                      | 14.9487(4)                                                                                      | 14.9418(4)                                                                                      | 14.9837(4)                                                                                      |
| <i>c</i> (Å)                                                                             | 18.8648(6)                                                                                      | 18.7892(5)                                                                                      | 18.7191(5)                                                                                      | 18.6193(5)                                                                                      |
| <i>α</i> (°)                                                                             | 77.3590(10)                                                                                     | 77.1470(10)                                                                                     | 77.1450(10)                                                                                     | 76.9370(10)                                                                                     |
| <i>β</i> (°)                                                                             | 76.2910(10)                                                                                     | 76.1020(10)                                                                                     | 76.4180(10)                                                                                     | 76.3470(10)                                                                                     |
| <i>γ</i> (°)                                                                             | 86.4830(10)                                                                                     | 86.4130(10)                                                                                     | 86.2140(10)                                                                                     | 86.0280(10)                                                                                     |
| <i>V</i> , Å <sup>3</sup>                                                                | 3711.50(19)                                                                                     | 3677.05(18)                                                                                     | 3665.99(18)                                                                                     | 3652.76(18)                                                                                     |
| <i>Z</i>                                                                                 | 2                                                                                               | 2                                                                                               | 2                                                                                               | 2                                                                                               |
| <i>D</i> <sub>calc</sub> , g cm <sup>-3</sup>                                            | 1.534                                                                                           | 1.550                                                                                           | 1.560                                                                                           | 1.565                                                                                           |
| <i>μ</i> , mm <sup>-1</sup>                                                              | 0.575                                                                                           | 0.632                                                                                           | 0.691                                                                                           | 0.754                                                                                           |
| <i>F</i> (000)                                                                           | 1772                                                                                            | 1776                                                                                            | 1780                                                                                            | 1784                                                                                            |
| <i>θ</i> range for data collection (°)                                                   | 1.669–25.000                                                                                    | 1.143–25.000                                                                                    | 1.607–25.000                                                                                    | 1.153–27.570                                                                                    |
| Refl. collected                                                                          | 43364                                                                                           | 49826                                                                                           | 38740                                                                                           | 61058                                                                                           |
| Independent refl.                                                                        | 13083                                                                                           | 12969                                                                                           | 12915                                                                                           | 16876                                                                                           |
| <i>R</i> (int) <sup>a</sup>                                                              | 0.0299                                                                                          | 0.0191                                                                                          | 0.0284                                                                                          | 0.0282                                                                                          |
| Data/restraints/parameters                                                               | 13083 / 24/ 992                                                                                 | 12969/42/992                                                                                    | 12915/ 24/992                                                                                   | 16876/0/ 994                                                                                    |
| Completeness to <i>θ</i> (%)                                                             | 100.0                                                                                           | 100.0                                                                                           | 100.0                                                                                           | 99.8                                                                                            |
| Goodness-of-fit on <i>F</i> <sup>2</sup>                                                 | 1.045                                                                                           | 1.031                                                                                           | 1.028                                                                                           | 1.021                                                                                           |
| <i>R</i> <sub>1</sub> , <i>wR</i> <sub>2</sub> ( <i>I</i> > 2σ( <i>I</i> )) <sup>b</sup> | 0.0505, 0.1300                                                                                  | 0.0535, 0.1487                                                                                  | 0.0457, 0.1206                                                                                  | 0.0491, 0.1278                                                                                  |
| <i>R</i> <sub>1</sub> , <i>wR</i> <sub>2</sub> (all data) <sup>b</sup>                   | 0.0689, 0.1375                                                                                  | 0.0590, 0.1521                                                                                  | 0.0607, 0.1273                                                                                  | 0.0641, 0.1371                                                                                  |
| Largest diff. peak and hole / Å <sup>-3</sup>                                            | 1.125 and -1.008                                                                                | 1.120 and -1.196                                                                                | 1.034 and -0.892                                                                                | 1.473 and -1.012                                                                                |
| CCDC number                                                                              | 1942109                                                                                         | 1942110                                                                                         | 1942111                                                                                         | 1942112                                                                                         |

$$^a R_{\text{int}} = \frac{\sum |F_o^2 - F_{o,\text{mean}}^2|}{\sum F_o^2}, ^b R_1 = \frac{\sum (|F_o| - |F_c|)}{\sum |F_o|}; wR_2 = [\sum w(F_o^2 - F_c^2)^2 / \sum w(F_o^2)^2]^{1/2}$$

**Table S2** Results of continuous shape measures calculations using program Shape 2.1 for compounds **1–4**.<sup>a</sup>

| CN = 7 <sup>b</sup>    | HP-7   | HPY-7  | PBPY-7 | COC-7 | CTPR-7 | JPBPY-7 | JETPY-7 |
|------------------------|--------|--------|--------|-------|--------|---------|---------|
| <b>1</b>               | 27.978 | 22.283 | 1.653  | 6.447 | 4.998  | 4.625   | 17.671  |
| <b>2</b>               | 28.056 | 22.370 | 1.482  | 6.675 | 5.225  | 4.202   | 18.219  |
| <b>3</b>               | 28.986 | 22.755 | 1.208  | 6.699 | 5.117  | 3.806   | 18.889  |
| <b>4a</b> <sup>c</sup> | 29.553 | 22.661 | 1.201  | 6.818 | 5.114  | 3.296   | 20.061  |
| <b>4b</b> <sup>c</sup> | 29.760 | 23.638 | 1.112  | 6.559 | 5.109  | 3.232   | 20.354  |

<sup>a</sup> the listed values correspond to the deviation between the ideal and real coordination polyhedra, the lowest values are in red color.

<sup>b</sup> HP-7 = heptagon, HPY-7 = hexagonal pyramid, PBPY-7 = pentagonal bipyramid, COC-7 = capped octahedron, CTPR-7 = capped trigonal prism.

<sup>c</sup> calculations were performed for two crystallographically independent molecules present in the asymmetric unit of **4**.

**Table S3** Parameters of one-component Debye model for **3**.

| $T/\text{K}$ | $\chi_S/(10^{-6} \text{ m}^3\text{mol}^{-1})$ | $\chi_T/(10^{-6} \text{ m}^3\text{mol}^{-1})$ | $\alpha$ | $\tau/\text{(s)}$ |
|--------------|-----------------------------------------------|-----------------------------------------------|----------|-------------------|
| 1.9          | 0.5465                                        | 9.3676                                        | 0.0360   | 3.79E-04          |
| 2.1          | 0.4772                                        | 8.5063                                        | 0.0429   | 2.95E-04          |
| 2.3          | 0.4723                                        | 7.8689                                        | 0.0385   | 2.40E-04          |
| 2.5          | 0.4225                                        | 7.2721                                        | 0.0410   | 1.91E-04          |
| 2.7          | 0.3045                                        | 6.7651                                        | 0.0418   | 1.50E-04          |
| 2.9          | 0.2364                                        | 6.3360                                        | 0.0438   | 1.23E-04          |
| 3.1          | 0.3043                                        | 5.9433                                        | 0.0284   | 1.03E-04          |
| 3.3          | 0.4118                                        | 5.6110                                        | 0.0349   | 8.89E-05          |
| 3.5          | 0.4167                                        | 5.3075                                        | 0.0350   | 7.44E-05          |
| 3.7          | 0.5233                                        | 5.0392                                        | 0.0077   | 6.71E-05          |
| 3.9          | 0.3856                                        | 4.7989                                        | 0.0092   | 5.59E-05          |
| 4.1          | 0.5628                                        | 4.5769                                        | 0.0140   | 5.11E-05          |
| 4.3          | 0.4393                                        | 4.3766                                        | 0.0068   | 4.40E-05          |
| 4.5          | 0.6701                                        | 4.1932                                        | 0.0063   | 4.05E-05          |
| 4.7          | 0.9442                                        | 4.0325                                        | 0.0069   | 4.01E-05          |
| 4.9          | 0.9838                                        | 3.8823                                        | 0.0072   | 3.48E-05          |
